# Supplementary material
Source: publisher figshare collection journal article supplement (https://acs.figshare.com/ndownloader/files/4169191)
Supplement: Supplementary file 1 [file 4169191]

# **Supporting Information for “Development of Calculation and Analysis Methods for Dynamic First Hyperpolarizability Based on the Ab Initio Molecular Orbital – Quantum Master Equation Method”**

Ryohei Kishi\*, Hiroaki Fujii, Shingo Kishimoto, Yusuke Murata, Soichi Ito, Katsuki Okuno, Yasuteru Shigeta, Masayoshi Nakano\*

*Department of Materials Engineering Science, Graduate School of Engineering Science, Osaka University, Toyonaka, Osaka 560-8531, Japan*

## Contents

- jp301213z\_si\_002.pdf:** Movie sequence of  $\rho_{\text{pol}}(\mathbf{r}, t)$  of system **1** shown in Figure 3.
- jp301213z\_si\_003.pdf:** Movie sequence of  $\rho_{\text{pol}}(\mathbf{r}, t)$  of system **2** shown in Figure 3.
- jp301213z\_si\_004.pdf:** Movie sequence of  $\rho_{\text{pol}}(\mathbf{r}, t)$  of system **3** shown in Figure 3.
- jp301213z\_si\_005.pdf:** Movie sequence of SHG response density  $\rho^{(2)}(\mathbf{r}, -2\omega; \omega, \omega) \cos 2\omega t$  of system **1**.
- jp301213z\_si\_006.pdf:** Movie sequence of SHG response density  $\rho^{(2)}(\mathbf{r}, -2\omega; \omega, \omega) \cos 2\omega t$  of system **2**.
- jp301213z\_si\_007.pdf:** Movie sequence of SHG response density  $\rho^{(2)}(\mathbf{r}, -2\omega; \omega, \omega) \cos 2\omega t$  of system **3**.
